# Supplementary material for: Mushroom-like Au/NiCo2O4nanohybrids as high-performance binder-free catalytic cathodes for lithium–oxygen batteries
Source: Royal Society of Chemistry journal article supplement (doi:10.1039/c4ta06850e), 2015-01-01
Supplement: c4ta06850e1.pdf [file c4ta06850e1.pdf]

## Supplementary Information

### **Mushroom-like Au/NiCo<sub>2</sub>O<sub>4</sub> nanohybrid as high-performance binder-free catalytic cathode for lithium–oxygen batteries**

Fangfang Tu,<sup>a</sup> Jian Xie,<sup>\*ab</sup> Shichao Zhang,<sup>c</sup> Gaoshao Cao,<sup>b</sup> Tiejun Zhu<sup>a</sup> and Xinbing Zhao<sup>ab</sup>

<sup>a</sup>*State Key Laboratory of Silicon Materials, School of Materials Science and Engineering, Zhejiang University, Hangzhou 310027, China*

<sup>b</sup>*Key Laboratory of Advanced Materials and Applications for Batteries of Zhejiang Province, Hangzhou 310027, China*

<sup>c</sup>*School of Materials Science and Engineering, Beijing University of Aeronautics and Astronautics, Beijing 100191, China*

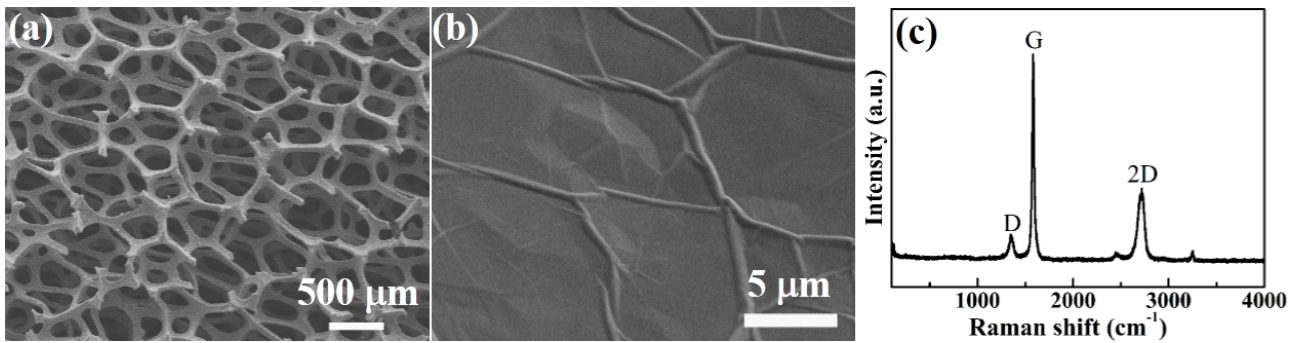

Fig. S1 (a) SEM image of 3D-G, (b) enlarged view of (a), and (c) Raman spectrum of 3D-G.

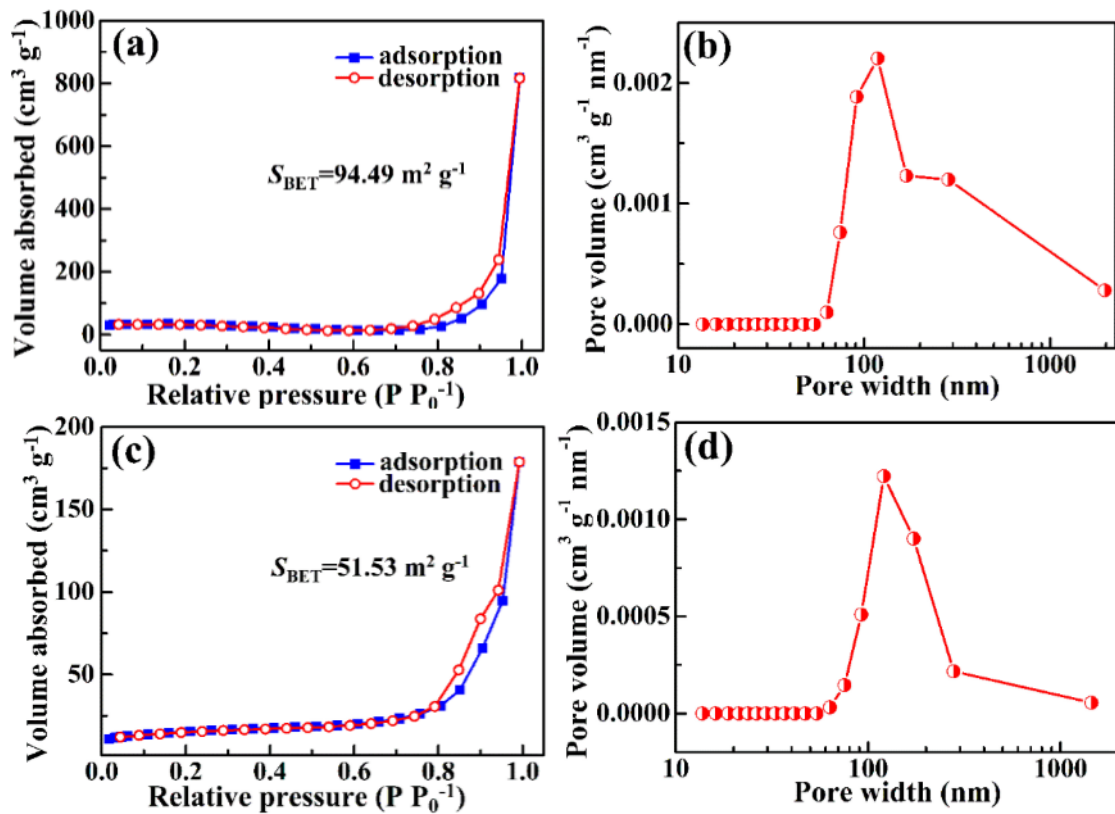

Fig. S2 (a) Nitrogen adsorption and desorption isotherms and (b) pore size distribution of Au/NiCo<sub>2</sub>O<sub>4</sub>/3D-G, and (c) nitrogen adsorption and desorption isotherms and (d) pore size distribution of NiCo<sub>2</sub>O<sub>4</sub>/3D-G.

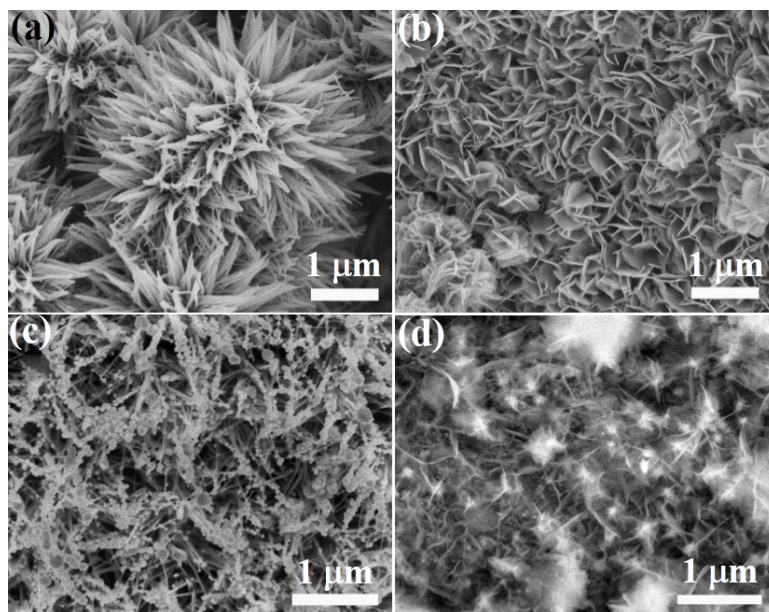

**Fig. S3** SEM images of  $\text{NiCo}_2\text{O}_4/3\text{D-G}$  on Ni foam after impregnation in aqueous solution of (a) HCl, (b)  $\text{H}_2\text{PtCl}_6$ , (c)  $\text{Na}_2\text{PdCl}_4$ , and (d)  $\text{Na}_2\text{PdCl}_4$  with HCl.

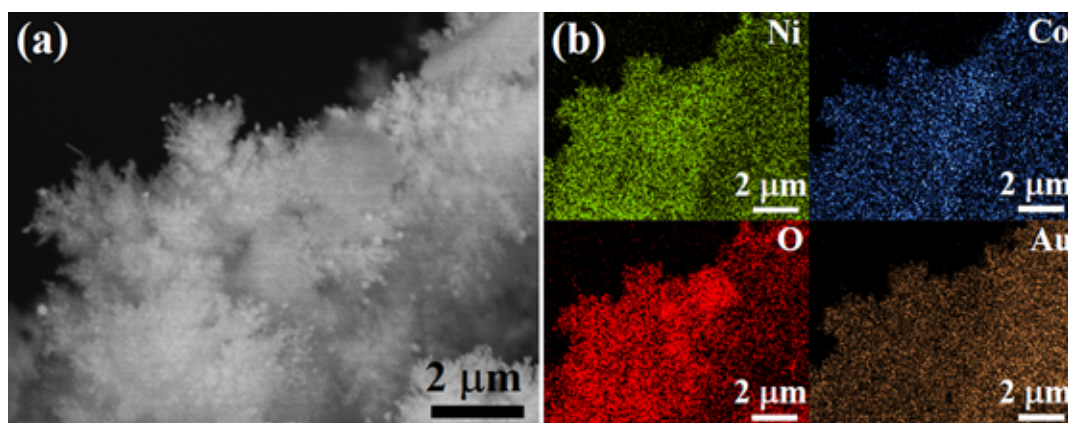

**Fig. S4** (a) SEM image of  $\text{Au/NiCo}_2\text{O}_4/3\text{D-G}$  and (b) the corresponding EDS mapping.

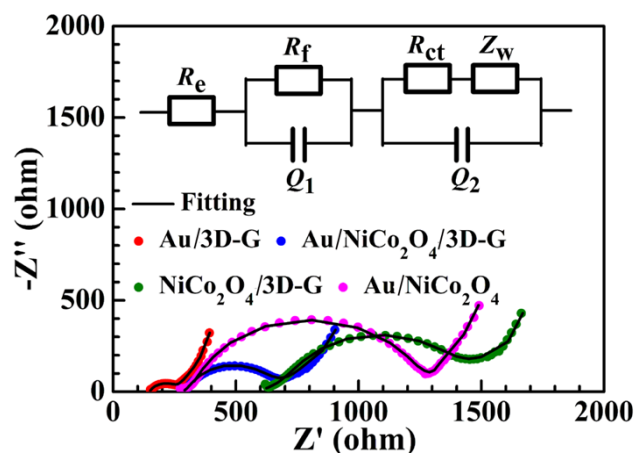

**Fig. S5** Nyquist plots of Li–O<sub>2</sub> batteries with different catalytic cathodes. The Nyquist plots are fitted using the equivalent circuit in the inset, where  $R_e$  denotes the electrolyte and ohm resistance,  $R_f$  and  $Q_1$  are the resistance and capacitance of surface film,  $R_{ct}$  and  $Q_2$  are the charge transfer resistance and double-layer capacitance, and  $Z_w$  represents the Warburg impedance corresponding to the bulk diffusion of Li ions.

**Table S1** Fitting results of the Nyquist plots using the equivalent circuit.

| Sample                                    | $R_e$ ( $\Omega$ ) | $R_f$ ( $\Omega$ ) | $Q_1$                |      | $R_{ct}$ ( $\Omega$ ) | $Q_2$                |      |
|-------------------------------------------|--------------------|--------------------|----------------------|------|-----------------------|----------------------|------|
|                                           |                    |                    | $Y$                  | $n$  |                       | $Y$                  | $n$  |
| Au/3D-G                                   | 150.7              | 118.4              | $1.5 \times 10^{-5}$ | 0.77 | 98.9                  | $1.1 \times 10^{-4}$ | 0.96 |
| Au/NiCo <sub>2</sub> O <sub>4</sub> /3D-G | 283.4              | 259.4              | $7.1 \times 10^{-6}$ | 0.90 | 271.3                 | $7.4 \times 10^{-4}$ | 0.38 |
| NiCo <sub>2</sub> O <sub>4</sub> /3D-G    | 589.4              | 523.4              | $1.0 \times 10^{-5}$ | 0.93 | 688.4                 | $5.5 \times 10^{-4}$ | 0.30 |
| Au/NiCo <sub>2</sub> O <sub>4</sub>       | 286.6              | 818.7              | $1.4 \times 10^{-5}$ | 0.91 | 316.6                 | $1.3 \times 10^{-3}$ | 0.33 |

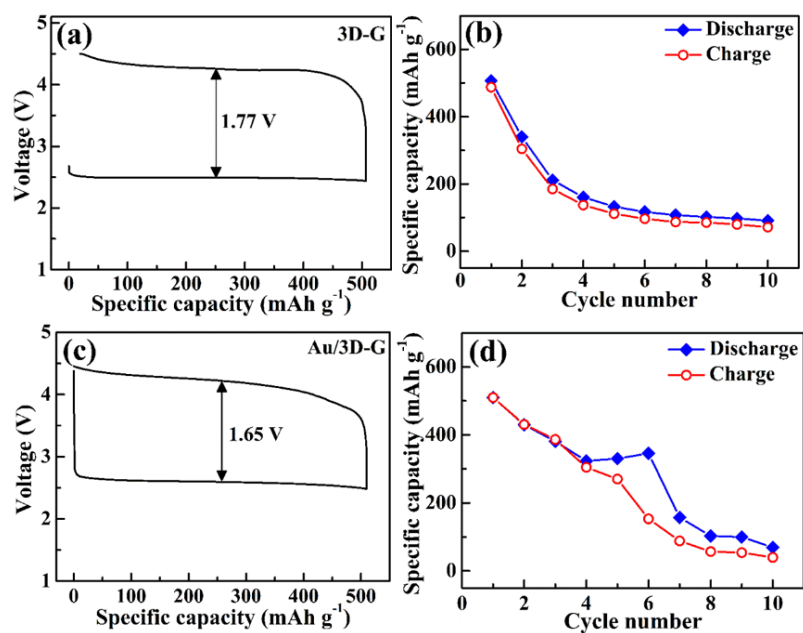

**Fig. S6** (a) The first discharge-charge curve and (b) cycling performance of Li-O<sub>2</sub> battery with 3D-G electrode, and (c) the first discharge-charge curve and (d) cycling performance of Li-O<sub>2</sub> battery with Au/3D-G electrode. The current density is 42.5 mA g<sup>-1</sup> and the specific capacity is limited at 510 mAh g<sup>-1</sup>.

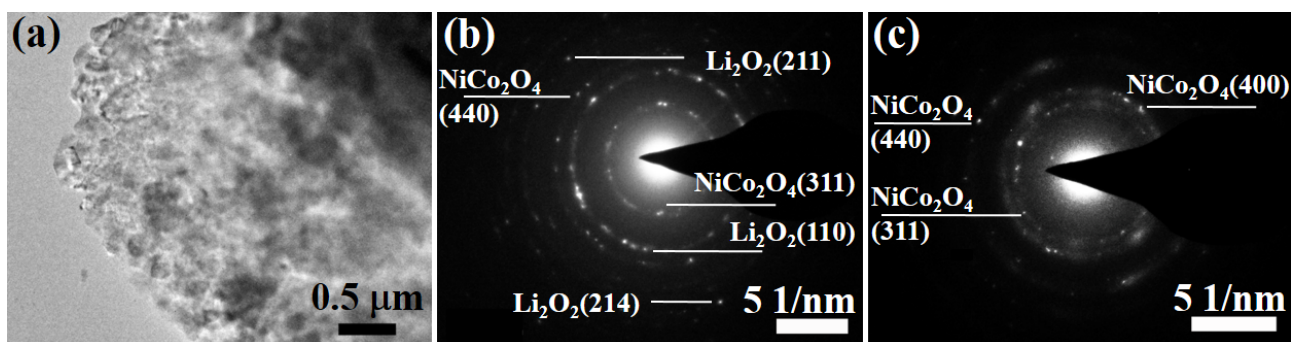

**Fig. S7** (a) TEM image and the corresponding SAED patterns of Au/NiCo<sub>2</sub>O<sub>4</sub>/3D-G electrodes after (b) discharge and (c) charge to 510 mAh g<sup>-1</sup> at 42.5 mA g<sup>-1</sup>.

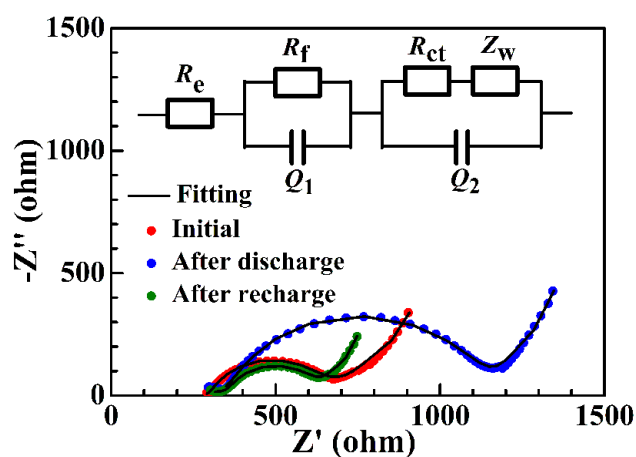

**Fig. S8** Nyquist plots of Li–O<sub>2</sub> battery with Au/NiCo<sub>2</sub>O<sub>4</sub>/3D-G electrode at initial state, discharged to 2.2 V, and recharged to 4.3 V. The meanings of the symbols in the equivalent circuit are same with those in Fig. S5.

**Table S2** Fitting results of the Nyquist plots using the equivalent circuit.

| Sample          | $R_e$ ( $\Omega$ ) | $R_f$ ( $\Omega$ ) | $Q_1$                |      | $R_{ct}$ ( $\Omega$ ) | $Q_2$                |      |
|-----------------|--------------------|--------------------|----------------------|------|-----------------------|----------------------|------|
|                 |                    |                    | $Y$                  | $n$  |                       | $Y$                  | $n$  |
| Initial         | 283.4              | 259.4              | $7.1 \times 10^{-6}$ | 0.90 | 271.3                 | $7.4 \times 10^{-4}$ | 0.38 |
| After discharge | 296.0              | 631.2              | $9.8 \times 10^{-6}$ | 0.92 | 503.2                 | $1.0 \times 10^{-3}$ | 0.28 |
| After recharge  | 270.0              | 209.7              | $4.0 \times 10^{-5}$ | 0.91 | 206.9                 | $3.0 \times 10^{-4}$ | 0.33 |

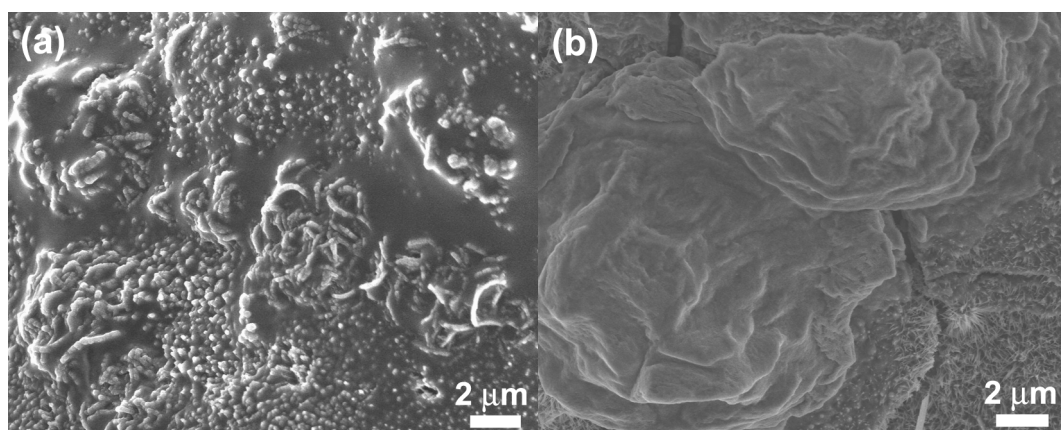

**Fig. S9** SEM images of NiCo<sub>2</sub>O<sub>4</sub>/3D-G electrode after (a) discharge and (b) recharge to 510 mAh g<sup>-1</sup> at 42.5 mA g<sup>-1</sup> on the 10<sup>th</sup> cycle.



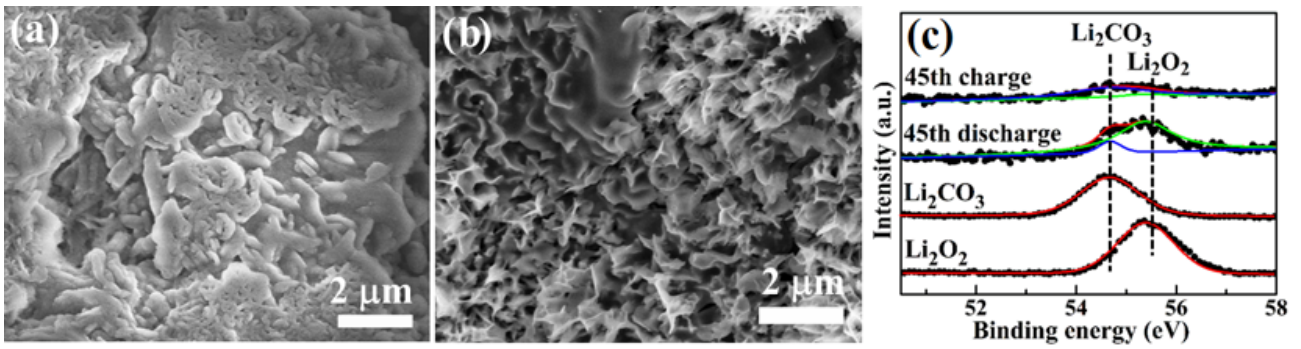

**Fig. S10** SEM images and Li1s XPS of Au/NiCo<sub>2</sub>O<sub>4</sub>/3D-G electrodes at different states: (a) SEM image after the 45<sup>th</sup> discharge, (b) SEM image after the 45<sup>th</sup> charge and (c) Li1s XPS after the 45<sup>th</sup> cycle. The batteries are charged and discharged to 510 mAh g<sup>-1</sup> at 42.5 mA g<sup>-1</sup>.
